# Supplementary material for: Highly stable anion exchange membranes based on quaternized polypropylene
Source: Royal Society of Chemistry journal article supplement (doi:10.1039/c5ta01420d), 2015-01-01
Supplement: c5ta01420d1.pdf [file c5ta01420d1.pdf]

## Supporting information

### Highly Stable Anion Exchange Membranes Based on Quaternized Polypropylene

Min Zhang<sup>a</sup>, Jinling Liu<sup>a</sup>, Yiguang Wang,<sup>\*a</sup> Linan An,<sup>c</sup> Michael D. Guiver,<sup>d,e</sup> and Nanwen Li<sup>\*b</sup>

<sup>a</sup> State Key Laboratory of Solidification Processing, Northwestern Polytechnical University, Xi'an, 710072, China

<sup>b</sup> State Key Laboratory of Coal Conversion, Institute of Coal Chemistry, Chinese Academy of Sciences, Taiyuan, 030001, China

<sup>c</sup> Department of Materials Science and Engineering, Advanced Materials Processing and Analysis Center, University of Central Florida, Orlando, FL 32816, USA

<sup>d</sup> State Key Laboratory of Engines, School of Mechanical Engineering, Tianjin University, Tianjin 300072, China

<sup>e</sup> Collaborative Innovation Center of Chemical Science and Engineering (Tianjin), Tianjin 300072, China

\*To whom correspondence should be addressed. E-mail: [wangyiguang@nwpu.edu.cn](mailto:wangyiguang@nwpu.edu.cn) (Y. Wang) and [linanwen@sxicc.ac.cn](mailto:linanwen@sxicc.ac.cn) (N. Li)

#### 1. GPC measurement

The polymer molecular weights were also analyzed on a PL-220 series high temperature gel permeation chromatography (GPC) unit equipped with four PLgel Mixed-A (20 $\mu$ m) columns (Polymer Laboratory Inc.). The oven temperature was at 150 °C and the temperatures of autosampler's hot and the warm zones were at 135 °C and 130 °C respectively. The solvent 1, 2, 4-trichlorobenzene (TCB) containing ~200 ppm tris(2,4-di-tert-butylphenyl) phosphite (Irgafos 168) was nitrogen purged. The flow rate was 1.0 mL/min and the injection volume was 200  $\mu$ l. A 2 mg/mL sample concentration was prepared by dissolving the sample in N<sub>2</sub> purged and preheated TCB (containing 200 ppm Irgafos 168) for 2.5 h at 160 °C with gentle agitation.

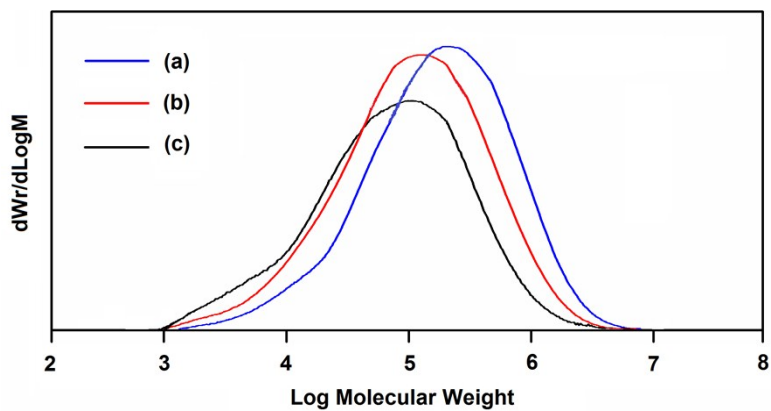

**Fig. S1.** GPC molecular weight distribution overlay of three PP based *co*- and terpolymer with incorporation of (a) 7.4%, (b) 20.8% and (c) 20.1%.

## 2. FT-IR measurement

Fourier transform infrared spectroscopy (FTIR) was recorded on a PE-1710 spectrometer from 4000 to 400  $\text{cm}^{-1}$  with a 4  $\text{cm}^{-1}$  resolution in 64 scans using polymer thin films (about 10 to 20  $\mu\text{m}$ ), which was prepared by compression-molding polymer powders between PTFE coated aluminum sheets at 190  $^{\circ}\text{C}$  and 25000 psi.

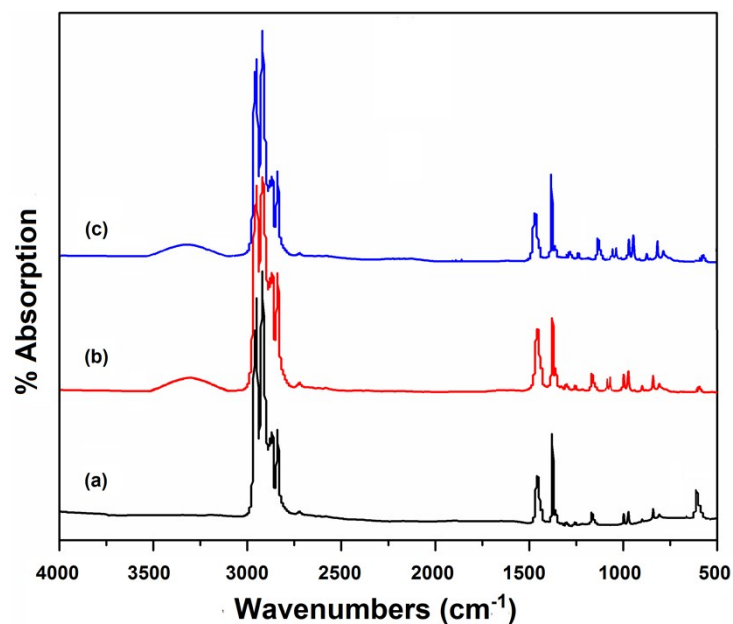

**Fig. S2.** FT-IR spectra of (a) PP-Br-20, (b) PP-TMA-20 and (c) PP-DMHDA-20 membranes in the hydroxide form.

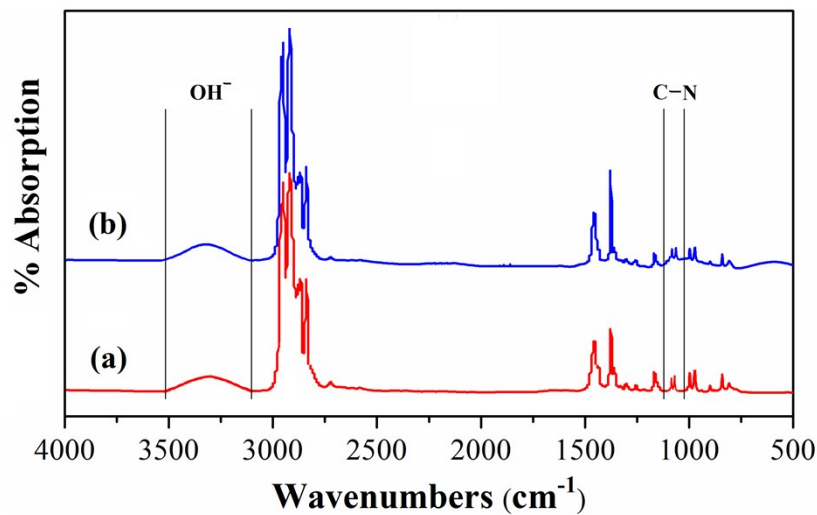

**Fig. S3.** The FT-IR spectra of changing trend for x-PP-DMHDA-20 AEM membranes after immersion in 10 M NaOH at 80 °C for: (a) 0 h and (b) 700 h.

### 3. NMR measurement

The polymer molecular weights were also analyzed on a PL-220 series high temperature gel permeation chromatography (GPC) unit equipped with four PLgel Mixed-A (20 $\mu$ m) columns (Polymer Laboratory Inc.). The oven temperature was at 150 °C and the temperatures of autosampler's hot and the warm zones were at 135 °C and 130 °C respectively. The solvent 1, 2, 4-trichlorobenzene (TCB) containing ~200 ppm tris(2,4-di-tert-butylphenyl) phosphite (Irgafos 168) was nitrogen purged. The flow rate was 1.0 mL/min and the injection volume was 200  $\mu$ l. A 2 mg/mL sample concentration was prepared by dissolving the sample in N<sub>2</sub> purged and preheated TCB (containing 200 ppm Irgafos 168) for 2.5 h at 160 °C with gentle agitation.

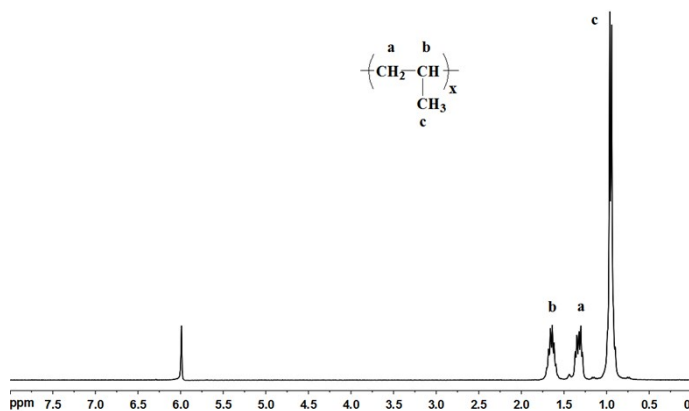

**Fig. S4.** <sup>1</sup>H NMR spectra of PP in 1,1,2,2-tetrachloroethane-*d*<sub>2</sub>.

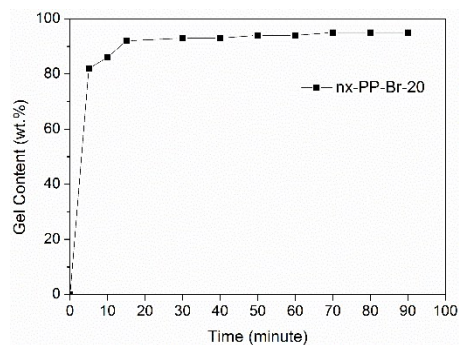

**Fig. S5.** Gel content of nx-PP-Br-20 (0.7 mol% of styrene group) versus different heating times on identical temperature of 220 °C.

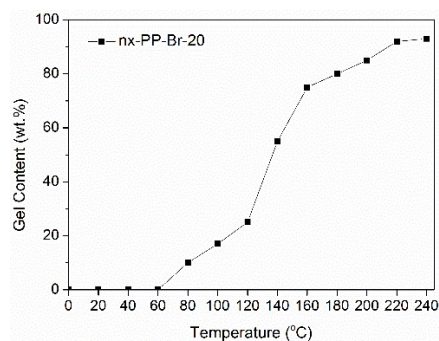

**Fig. S6.** Gel content of nx-PP-Br-20 (0.7 mol% of styrene group) versus different reaction temperatures on identical intervals of 15 minutes.

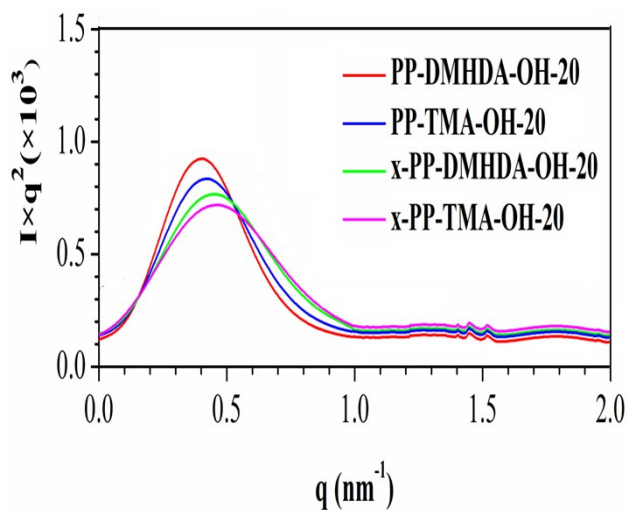

**Fig. S7.** SAXS profiles of dry polymer membranes.
